# Supplementary material
Source: Research Square preprint supplement (doi:10.21203/rs.3.rs-9197723/v1)
Supplement: Supplementary file 1 [file 2d4f4dd8635b63939d3168d4.docx]

**Supplementary Information**

# Supplementary Tables

**Supplementary Table S1 | Nuisance model comparison for CausalForestDML**

| **Nuisance Model** | **DR Estimate** | **95% CI** | **CI Width** |
| --- | --- | --- | --- |
| **Random Forest** | **0.280** | **0.244–0.316** | **0.072** |
| CatBoost | 0.272 | 0.217–0.325 | 0.108 |
| Logistic Regression | 0.618 | −0.248 to 1.959 | 2.207 |
| HistGradientBoosting | 1.620 | −0.790 to 4.329 | 5.119 |
| LightGBM | 1.102 | −1.230 to 3.603 | 4.833 |

*Random Forest was selected based on (1) algorithmic consistency with CausalForestDML's internal Generalised Random Forest, and (2) the narrowest CI width indicating stable estimation.*

**Supplementary Table S2 | Category-specific Q4–Q1 difference tests**

| **Category** | **Q4–Q1 Difference** | **Z-statistic** | **P value (one-tailed)** |
| --- | --- | --- | --- |
| JAKi | −0.118 | −2.59 | 0.005 |
| CTLA4-Ig | −0.184 | −3.63 | < 0.001 |
| IL-6i | −0.020 | −0.47 | 0.321 |

**Supplementary Table S3 | BLP coefficients for statistically significant effect modifiers**

*The BLP analysis evaluated 222 candidate features. Twenty-two covariates reached nominal significance (P < 0.05); of these, twelve were independently confirmed by Lasso regression (marked with †).*

| **Feature** | **Coefficient** | **SE** | **t-statistic** | **P value** |
| --- | --- | --- | --- | --- |
| Smoking† | −0.0127 | 0.0012 | −10.40 | < 0.001 |
| ESR (1 hour)† | 0.0005 | < 0.001 | 13.89 | < 0.001 |
| Age† | 0.0008 | < 0.001 | 8.20 | < 0.001 |
| DAS28-CRP† | 0.0166 | 0.0022 | 7.58 | < 0.001 |
| CRP† | 0.0025 | 0.0004 | 6.04 | < 0.001 |
| Albumin† | −0.0110 | 0.0020 | −5.51 | < 0.001 |
| Steinbrocker class† | 0.0040 | 0.0012 | 3.27 | 0.001 |
| WBC† | 0.0010 | 0.0003 | 3.21 | 0.001 |
| MMP-3† | < 0.001 | < 0.001 | 3.20 | 0.001 |
| Tender right index finger DIP (a31) | 0.0221 | 0.0082 | 2.71 | 0.007 |
| ACPA† | < 0.001 | < 0.001 | −2.71 | 0.007 |
| SDAI | −0.0009 | 0.0003 | −2.71 | 0.007 |
| DAS28-ESR | −0.0038 | 0.0014 | −2.69 | 0.007 |
| Haemoglobin† | −0.0013 | 0.0005 | −2.58 | 0.010 |
| Past sarilumab use | 0.0128 | 0.0053 | 2.40 | 0.016 |
| Creatinine | −0.0054 | 0.0023 | −2.37 | 0.018 |
| Past ozoralizumab use | 0.0195 | 0.0086 | 2.28 | 0.023 |
| Doctor VAS | 0.0001 | < 0.001 | 2.13 | 0.033 |
| Past TNFi use† | −0.0044 | 0.0022 | −1.99 | 0.047 |

*† Independently confirmed by Lasso regression.*

# Supplementary Figures

**
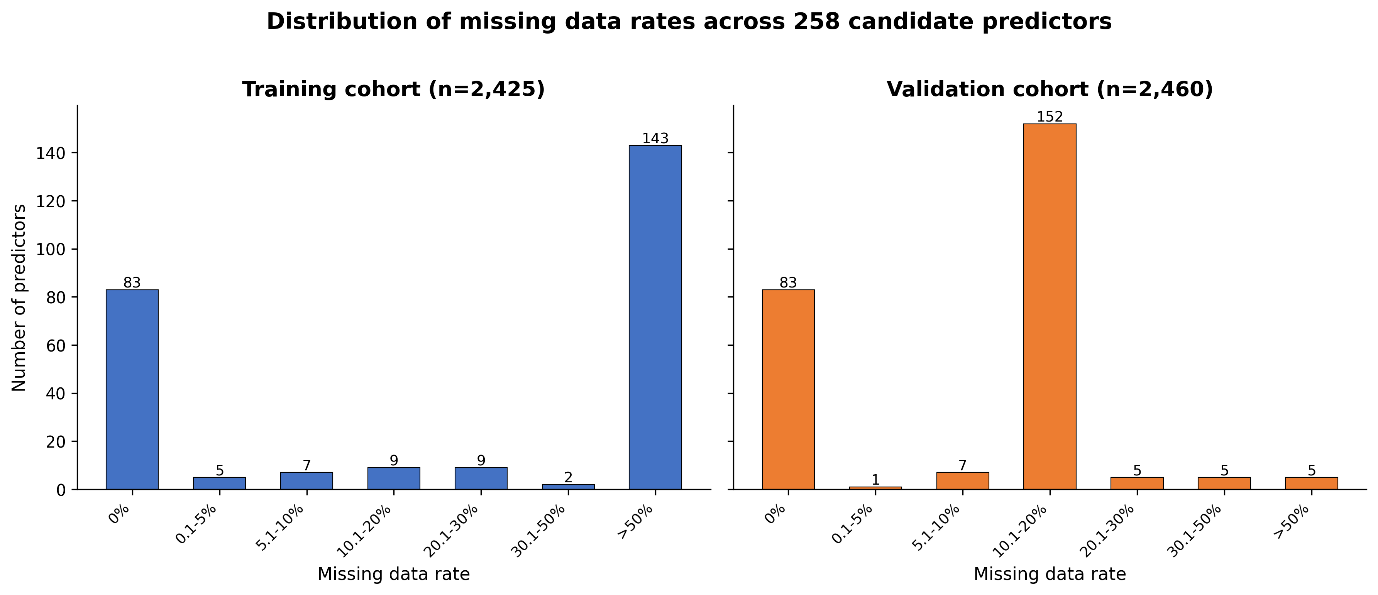
**

**Supplementary Fig. S1** | Distribution of missing data rates across 258 candidate predictors.

Of 258 candidate predictors, 83 (32.2%) had no missing values. The remaining 175 predictors had missing data rates ranging from 0.1% to 78.8% in the training cohort and 0.1% to 82.9% in the validation cohort. In the training cohort, 143 predictors had >50% missing data, primarily reflecting individual joint assessments (swollen and tender joint counts for 70 joints each) that were not systematically recorded at all facilities.


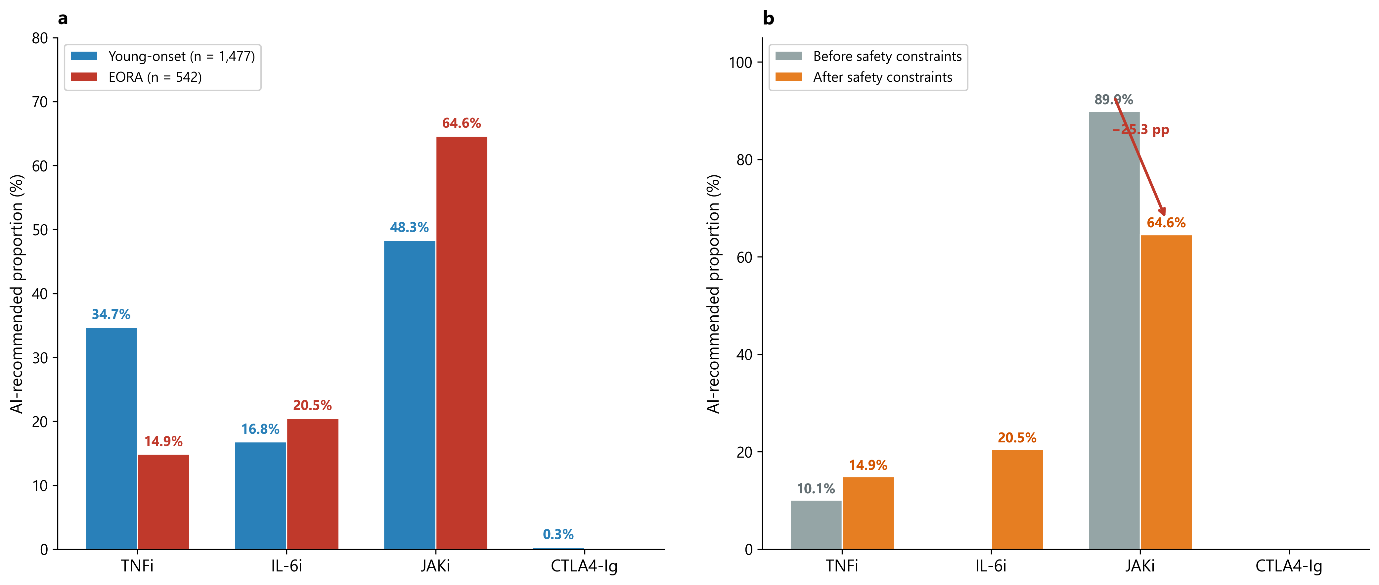


**Supplementary Fig. S2** | Elderly-onset RA (EORA) subgroup analysis of AI treatment recommendations.

**(a)** AI-recommended drug category distribution in the external validation cohort stratified by age of onset (EORA, onset age ≥ 60 years, n = 542; young-onset RA, onset age < 60 years, n = 1,477). EORA patients received significantly more JAKi recommendations (64.6% vs 48.3%) and fewer TNFi recommendations (14.9% vs 34.7%) compared with young-onset patients (chi-square P < 0.001). JAKi safety exclusion rates were higher in EORA (22.5%) than in young-onset RA (7.4%).

**(b)** Effect of clinician-guided safety constraints on EORA recommendation distribution (EORA patients only, n = 542). Before applying safety constraints, 89.9% of EORA patients were recommended JAKi; after exclusion of 122 patients (22.5%) meeting predefined risk criteria (age ≥ 65, smoking history, or elevated cardiovascular/malignancy risk), JAKi recommendations decreased by 25.3 percentage points to 64.6%, with redistributions primarily to IL-6i (0% → 20.5%) and TNFi (10.1% → 14.9%).

*EORA, elderly-onset rheumatoid arthritis; RA, rheumatoid arthritis; TNFi, tumour necrosis factor inhibitor; IL-6i, interleukin-6 inhibitor; JAKi, Janus kinase inhibitor; CTLA4-Ig, cytotoxic T-lymphocyte-associated antigen 4-immunoglobulin; pp, percentage points.*
